# Supplementary material for: The Spontaneous Vesicle–Micelle Transition in a Catanionic Surfactant System: A Chemical Trapping Study
Source: MDPI journal article supplement (doi:10.3390/molecules28166062), 2023-08-15
Supplement: s1 [file s1]

## Supplementary Information

### The spontaneous vesicle–micelle transition in a catanionic surfactant system: A chemical trapping study

Qihan Sun, Jiani Gong, Yujia Sun, Yao Song, Changyao Liu\*, Baocai Xu

*Department of Daily Chemical Engineering, Beijing Technology and Business University, No.  
11 Fucheng Road, Beijing, 100048, People's Republic of China*

\*Corresponding Author.

E-mail: [changyaoliu@btbu.edu.cn](mailto:changyaoliu@btbu.edu.cn) (C. Liu)

#### Table of Contents

|                                                                                                       |    |
|-------------------------------------------------------------------------------------------------------|----|
| Section I: Chemical trapping with 1-ArN <sub>2</sub> <sup>+</sup> in aqueous TMABr solutions          | S2 |
| Section II: Equations for calculations of chemical trapping product yields and interfacial molarities | S2 |
| Section III: Interfacial molarities                                                                   | S3 |

## Section I: Chemical trapping with 1-ArN<sub>2</sub><sup>+</sup> in aqueous TMABr solutions.

**Figure S1** shows the plot of the selectivity between bromide ion and water,  $S_w^{\text{Br}}$  versus  $[\text{Br}_t]$  in TMABr aqueous solutions. The data was also fitted into Equation S1, which was used to estimate the selectivity,  $S_w^{\text{Br}}$ , at the interfacial region.

$$S_w^{\text{Br}} = 11.2957 - 4.2421 \times \ln([\text{Br}_t]) \quad (\text{S1})$$

**Figure S1** Plot between  $S_w^{\text{Br}}$  and  $[\text{Br}_t]$ , in TMABr aqueous solutions (  $[\text{HBr}] = 1 \text{ mM}$ ) (a) containing 0 to 3.5 M  $[\text{Br}_t]$  ; and (b) containing 0.01 to 0.04 M  $[\text{Br}_t]$  fitted to equation  $S_w^{\text{Br}} = 11.2957 - 4.2421 \times \ln([\text{Br}_t])$ .

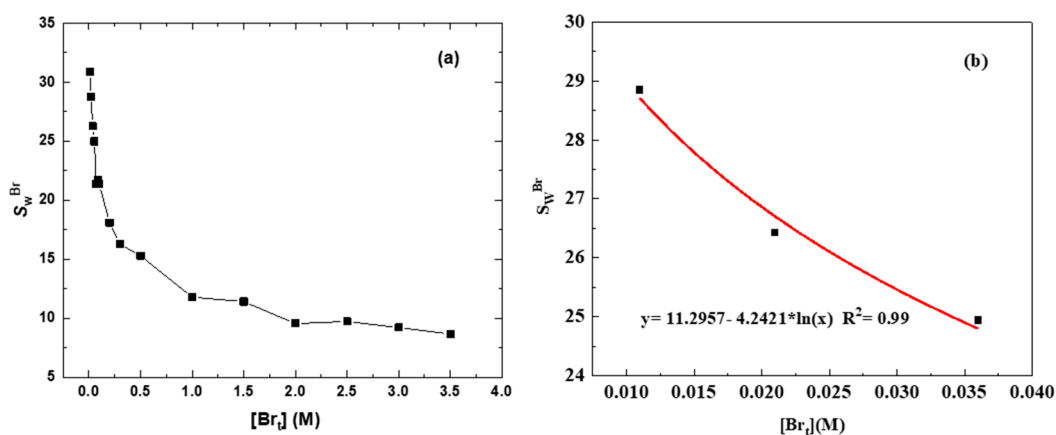

## Section II Equations for calculations of chemical trapping product yields and interfacial molarities

**Table S1.** Calibration curves for observed product yields

| Products   | Calibration curves                 | R <sup>2</sup> | Retention time (min) |
|------------|------------------------------------|----------------|----------------------|
| 16-ArOH    | $y = 1.000 \times 10^8 x + 77.138$ | 0.9995         | 13.5                 |
| 16-ArBr    | $y = 2.000 \times 10^8 x - 160.74$ | 0.9994         | 30                   |
| 16-ArOSOct | $y = 1.459 \times 10^8 x$          | 1              | 22                   |

The normalized product yields were calculated by **Equation S2-S4**:

$$\%16\text{-ArOH}_N = 100 \times \frac{\%16\text{-ArOH}}{\%16\text{-ArOH} + \%16\text{-ArOSOct} + \%16\text{-ArBr}} \quad (\text{S2})$$

$$\%16\text{-ArBr}_N = 100 \times \frac{\%16\text{-ArBr}}{\%16\text{-ArOH} + \%16\text{-ArOSOct} + \%16\text{-ArBr}} \quad (\text{S3})$$

$$\%16\text{-ArOSOct}_N = 100 \times \frac{\%16\text{-ArOSOct}}{\%16\text{-ArOH} + \%16\text{-ArOSOct} + \%16\text{-ArBr}} \quad (\text{S4})$$

**Equations S1 and S5-S6** were employed for interfacial molarity calculation [1]:

$$\%16\text{-ArOSOct}_N = 9.036 [\text{SO}_{3m}] - 0.103 \quad (\text{S5})$$

$$\%16\text{-ArOH}_N = 0.914 [\text{H}_2\text{O}_m] + 49.72 \quad (\text{S6})$$

### Section III: Interfacial molarities

**Table S2** Estimated values of interfacial molarities of  $\text{Br}_m$ ,  $\text{H}_2\text{O}_m$ , and  $\text{SO}_{3m}$ , in aqueous solutions of 20 – 500 mM CTAB/SOS solutions at 25°C.  $[\text{HBr}] = 1 \text{ mM}$ .

| [CTAB]+[SOS]<br>(mM) | Normalized yields (%) |                          |                      | Interfacial molarities(M)     |                  |                 |
|----------------------|-----------------------|--------------------------|----------------------|-------------------------------|------------------|-----------------|
|                      | 16-ArOH <sub>N</sub>  | 16-ArOSOOct <sub>N</sub> | 16-ArBr <sub>N</sub> | H <sub>2</sub> O <sub>m</sub> | SO <sub>3m</sub> | Br <sub>m</sub> |
| 20                   | 80.9                  | 17.1                     | 2.1                  | 34.08                         | 1.90             | 0.05            |
| 50                   | 80.2                  | 17.3                     | 2.5                  | 33.39                         | 1.92             | 0.06            |
| 80                   | 79.2                  | 18.4                     | 2.4                  | 32.27                         | 2.05             | 0.06            |
| 100                  | 78.4                  | 19.3                     | 2.4                  | 31.33                         | 2.14             | 0.06            |
| 200                  | 76.8                  | 20.6                     | 2.6                  | 29.63                         | 2.29             | 0.06            |
| 500                  | 74.0                  | 22.9                     | 3.1                  | 26.57                         | 2.55             | 0.08            |

**Table S3** Estimated values of interfacial molarities of  $\text{Br}_m$ ,  $\text{H}_2\text{O}_m$ , and  $\text{SO}_{3m}$ , in aqueous solutions of 200 – 500 mM NaBr/SOS solutions at 25°C.  $[\text{HBr}] = 1 \text{ mM}$ .

| [NaBr]+[SOS]<br>(mM) | Normalized yields (%) |                          |                      | Interfacial molarities(M)     |                  |                 |
|----------------------|-----------------------|--------------------------|----------------------|-------------------------------|------------------|-----------------|
|                      | 16-ArOH <sub>N</sub>  | 16-ArOSOOct <sub>N</sub> | 16-ArBr <sub>N</sub> | H <sub>2</sub> O <sub>m</sub> | SO <sub>3m</sub> | Br <sub>m</sub> |
| 200                  | 85.3                  | 12.1                     | 2.5                  | 38.95                         | 1.36             | 0.06            |
| 300                  | 85.7                  | 11.6                     | 2.7                  | 39.41                         | 1.29             | 0.06            |
| 400                  | 84.4                  | 12.7                     | 2.9                  | 37.92                         | 1.42             | 0.07            |
| 500                  | 85.7                  | 11.4                     | 2.9                  | 39.34                         | 1.28             | 0.07            |

### Reference

[1] C. Liu, Y. Wang, Y. Gao, Y. Zhang, L. Zhao, B. Xu, L.S. Romsted, Effects of interfacial specific cations and water molarities on AOT micelle-to-vesicle transitions by chemical trapping: the specific ion-pair/hydration model, *Phys. Chem. Chem. Phys.*, 21 (2019) 8633-8644.
